# Supplementary material for: CHD5, a Brain-Specific Paralog of Mi2 Chromatin Remodeling Enzymes, Regulates Expression of Neuronal Genes
Source: PLoS One. 2011 Sep 13;6(9):e24515. doi: 10.1371/journal.pone.0024515 (PMC3172237; doi:10.1371/journal.pone.0024515)
Supplement: Table S4 — Summary of CHD5 targets validated by Q-RT-PCR. The column “Target of CHD5” lists genes identified as CHD5 targets using microarray analysis. The column “CHD5 Function” lists the result validated in at least 3 independent experiments. “Activator” indicates expression was reduced following CHD5 depletion for at least one time window, “Repressor” indicates expression was increased following depletion, while Activator/Repressor indicates both, at different times. “CHD5 Binding” indicates measurement by ChIP; Yes indicates binding above control IP and control locus. “Region(s) indicate where binding was (or was not) observed. “Gene Sets” indicates, for the gen in that row, the gene sets from Table S2 this gene is found. (XLS) [file pone.0024515.s006.xls]

## Sheet: Sheet1
Target of CHD5	CHD5 Function	CHD5 Binding	Region(s)	Gene Sets
Cell Cycle Genes
Ndrg2	Activator
Transcription Genes
Nfia	Activator	Yes	+2k, +35k, +351k
Id2	Activator	Yes	-96k, -29k, -3k
Fos	Activator	No	+13.4k
Chromatin Genes
Baf45b/Neud4	Repressor	Yes	pro, +7k REI
Baf 60a	Repressor			Alzheimers up
Suv39h1	Repressor
Suv420h2	Repressor			Stem cell neuronal up
Satb1	Repressor
Dicer	Repressor			Alzheimers up Alzheimers incipient up; Stem cell neuronal up
Neuronal Genes
Apoe	Activator	No	pro
App	Activator	Yes	pro	Alzheimers up Alzheimers incipient up
Vip	Activator	Yes	pro	Alzheimers down
Npy	Activator			Alzheimers down
Gfap	Activator			Aging brain up; Alzheimers up
Grin1/NMDAr1	Activator/Repressor
Adora2	Activator			Alzheimers down
Nefm	Activator			Alzheimers down
Nefl	Activator			Alzheimers down
Fmr1	Activator			Stem cell neuronal up
Nrxn1	Activator			Alzheimers down; aging brain down
Ddit4	Activator	Yes	-11k, pro	Aging brain up
Maoa	Activator			Aging brain up; Stem cell neuronal up; Alzheimers down; Alzheimers incipient down
Ampd3	Repressor			Alzheimers up
Dlx1	Activator
L1cam	Repressor			Alzheimers down
Gabrd	Repressor			Aging brain down
Fgfr3	Activator			Aging brain up; Alzheimers up Alzheimers incipient up
Add3	Activator			Aging brain up; Alzheimers up Alzheimers incipient up
